# Supplementary material
Source: Springer Nature journal article supplement (https://www.springermedizin.de/resource/supplementary/13054_2010_9372_MOESM5_ESM.pdf/9706108)

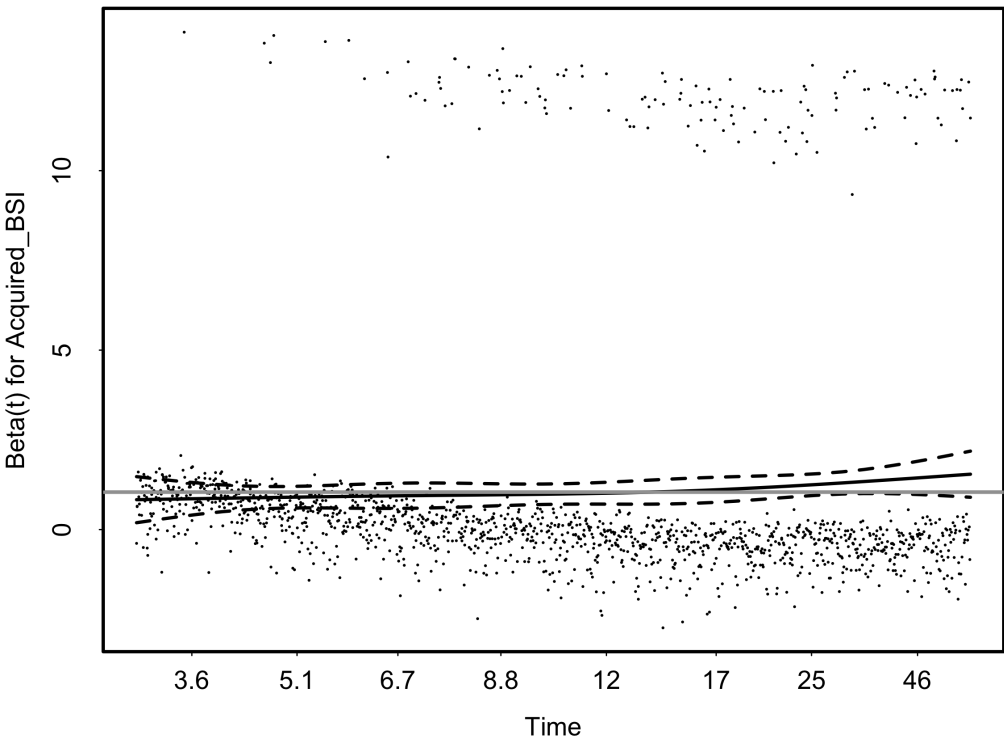

Supplement: MOESM5 [file 9706108]
